# Supplementary material
Source: PubMed Central journal article supplement (PMC3600570)
Supplement: supp_JOE-12-0234_FIG1andlegend.pdf [file supp_JOE-12-0234_FIG1andlegend.pdf]

# Supplementary Figure. 1

(A)

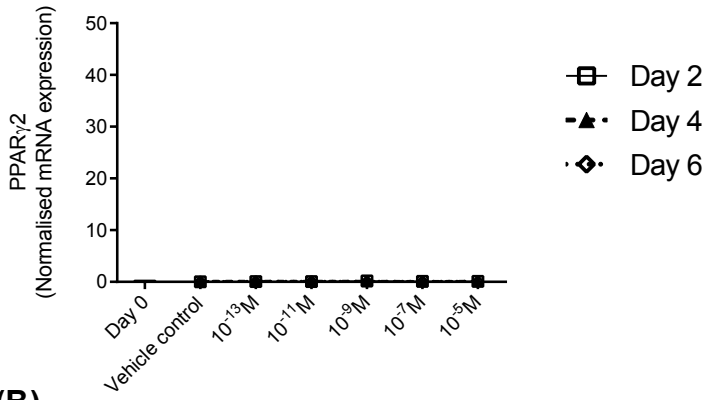

(B)

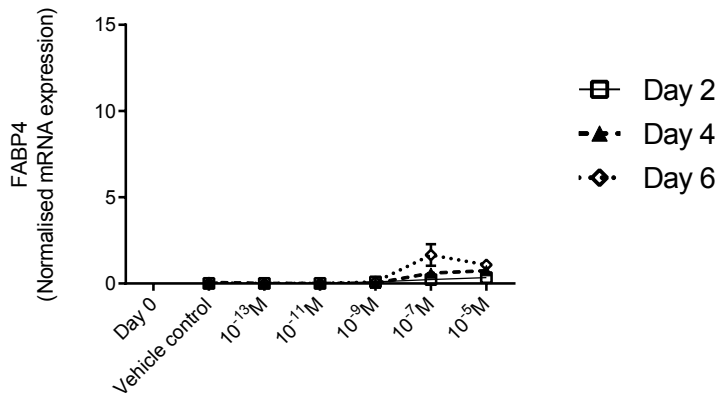

(C)

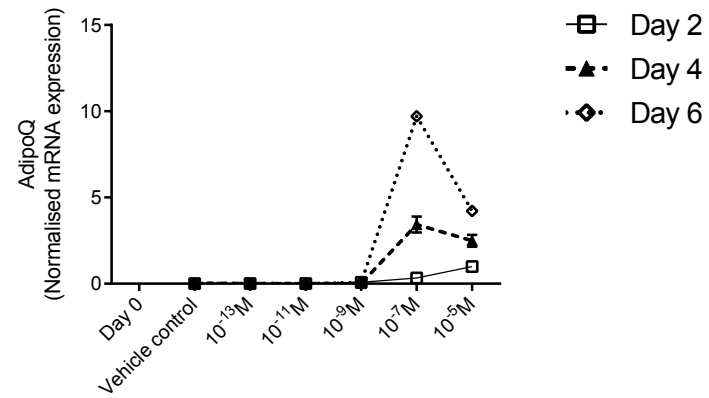

(D)

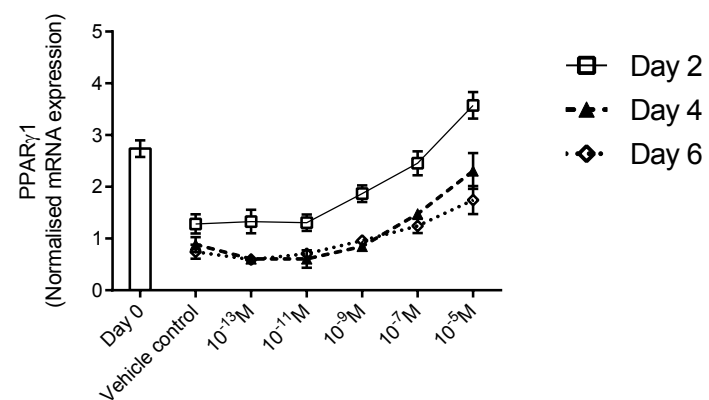

(E)

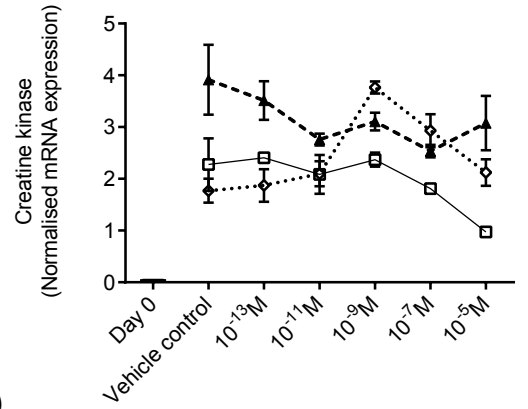

(F)

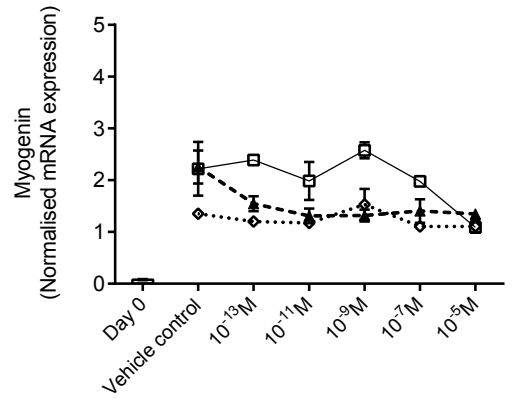

(G)

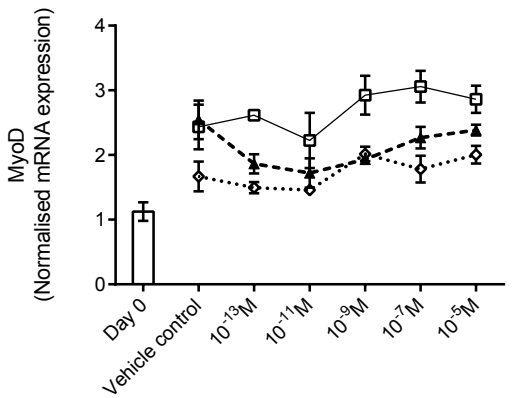

(H)

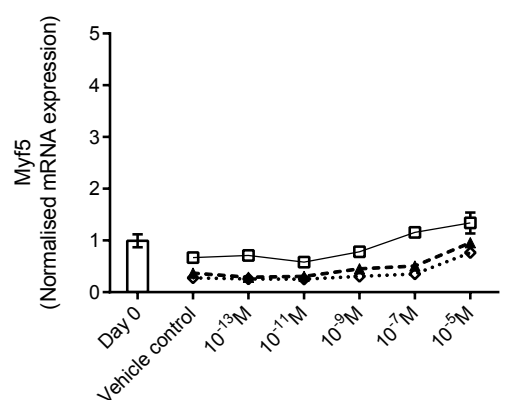

**Supplementary Figure 1.** Dose-dependent effects of 1,25(OH)<sub>2</sub>D<sub>3</sub> on expression of white adipocyte and skeletal muscle marker genes, determined by quantitative RT-PCR analysis. Levels of (A) *Pparγ2* (B) *Fabp4*, (C) AdipoQ/Adiponectin, (D) *PPARγ1*, (E) creatine kinase, (F) myogenin, (G) *MyoD* and (H) *Myf5* mRNAs were quantified in C2C12 cells cultured in the absence or presence of 10<sup>-13</sup>, 10<sup>-11</sup>, 10<sup>-9</sup>, 10<sup>-7</sup> or 10<sup>-5</sup> M 1,25(OH)<sub>2</sub>D<sub>3</sub> for 2, 4 or 6 days in myogenic differentiation media. Expression at day 0 (before differentiation media and 1,25(OH)<sub>2</sub>D<sub>3</sub> was added) is also included (but was very low for some genes). There were no significant effects on *Pparγ2* mRNA, but there were significant two-way interactions between Day of differentiation and 1,25(OH)<sub>2</sub>D<sub>3</sub> concentration for *Fabp4* and *AdipoQ* mRNA ( $P=0.001$  and  $P<0.001$  respectively). For *Pparγ1* mRNA, there was a significant effect of Day of differentiation ( $P<0.001$ ) and a significant effect of 1,25(OH)<sub>2</sub>D<sub>3</sub> concentration ( $P<0.001$ ). Similarly, there were significant two-way interactions between Day of differentiation and 1,25(OH)<sub>2</sub>D<sub>3</sub> concentration for creatine kinase and myogenin mRNA ( $P=0.002$  and  $P=0.039$  respectively). There was no significant two-way interaction for *MyoD* and *Myf5* mRNAs, but there were significant effects of Day of differentiation ( $P<0.001$  for both) and 1,25(OH)<sub>2</sub>D<sub>3</sub> concentration ( $P=0.011$  and  $P<0.001$  for *MyoD* and *Myf5* respectively).
