# Supplementary material
Source: PubMed Central journal article supplement (PMC3600570)
Supplement: supp_JOE-12-0234_FIG2andlegend.pdf [file supp_JOE-12-0234_FIG2andlegend.pdf]

# Supplementary Figure.2

(A)

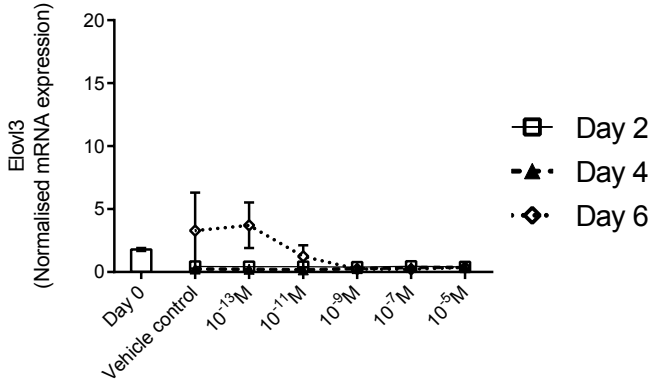

(E)

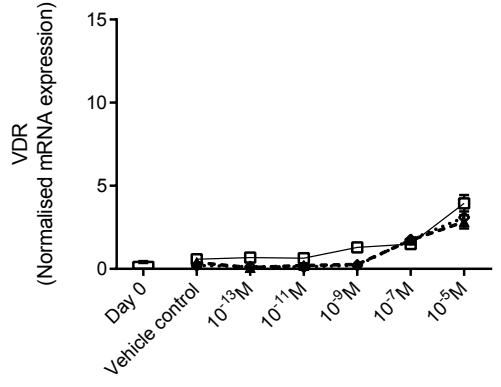

(B)

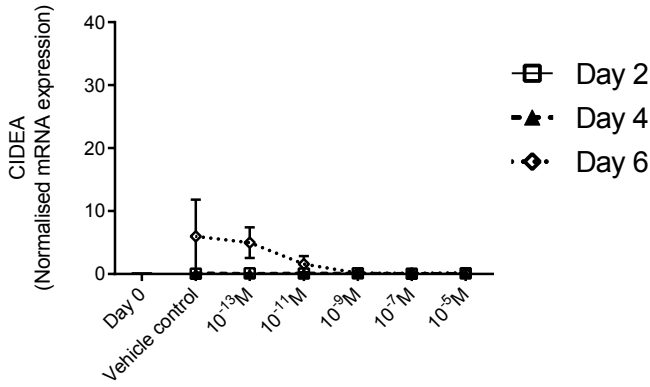

(F)

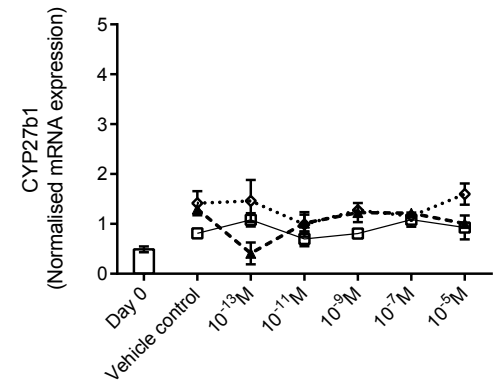

(C)

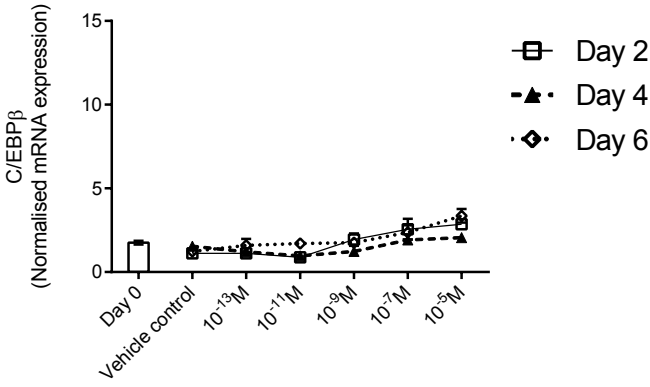

(G)

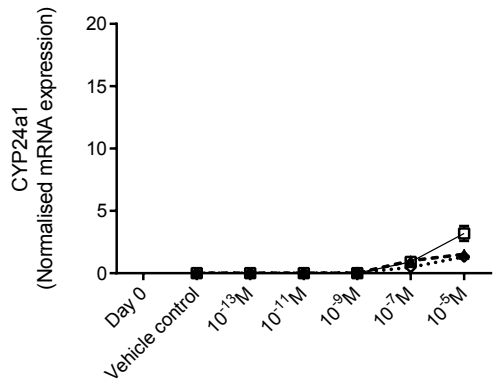

(D)

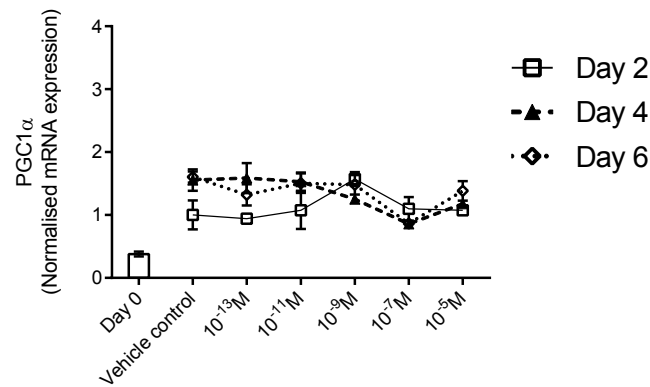

**Supplementary Figure 2** Dose-dependent effects of 1,25(OH)<sub>2</sub>D<sub>3</sub> on expression of brown adipocyte marker genes and vitamin D related genes, determined by quantitative RT-PCR analysis. Levels of (A) *Elovl3*, (B) *Cidea*, (C) *C/ebpβ*, (D) *Pgc1α*, (E) *Vdr*, (F) *Cyp27b1* (1 alpha-hydroxylase) and (G) *Cyp24a1* (24-hydroxylase) mRNAs were quantified in C2C12 cells cultured in the absence or presence of 10<sup>-13</sup>, 10<sup>-11</sup>, 10<sup>-9</sup>, 10<sup>-7</sup> or 10<sup>-5</sup> M 1,25(OH)<sub>2</sub>D<sub>3</sub> for 2, 4 or 6 days in myogenic differentiation media. Expression at day 0 (before differentiation media and 1,25(OH)<sub>2</sub>D<sub>3</sub> was added) is also included for reference. Significant effects of day of differentiation were observed for *Elovl3* (*P*=0.04), *Cidea* (*P*=0.038), *C/ebpβ* (*P*=0.019) and *Pgc1α* (*P*=0.029). There were significant effects of 1,25(OH)<sub>2</sub>D<sub>3</sub> concentration on *C/ebpβ* (*P*<0.001) and *Pgc1α* (*P*=0.006), but not for *Elovl3* or *Cidea*. There were significant two-way interactions between day of differentiation and 1,25(OH)<sub>2</sub>D<sub>3</sub> concentration observed for *Vdr* (*P*=0.029), *Cyp27b1* (*P*=0.047) and *Cyp24a1* (*P*<0.001) mRNA.
